# Supplementary material for: Thermal stability of Li2MnO3: from localized defects to the spinel phase
Source: Royal Society of Chemistry journal article supplement (doi:10.1039/c1dt11598g), 2011-12-07
Supplement: c1dt11598g.pdf [file c1dt11598g.pdf]

## Supplementary information

### Fig. S1 : Definition of the blocks used to simulate the presence of spinel-type domains in the $\text{Li}_2\text{MnO}_3$ stacking

The two structures are described using the same unit cell ( $a = 10.10 \text{ \AA}$ ,  $b = 17.50 \text{ \AA}$ ). Concerning the  $\text{Li}_2\text{MnO}_3$  stacking, the thickness of the slab is  $2.14 \text{ \AA}$  and that of the interslab is  $2.61 \text{ \AA}$ . Concerning the  $\text{LiMn}_2\text{O}_4$  stacking, the thickness of the slab is  $2.17 \text{ \AA}$  and that of the interslab is  $2.59 \text{ \AA}$ .

#### *Description the $\text{Li}_2\text{MnO}_3$ cell*

| Atom | x    | y     | z     | Occ. fact | $B_{\text{iso}}$ |
|------|------|-------|-------|-----------|------------------|
| O    | 0.0  | 0.0   | 0.0   | 1.0       | 1.0              |
| O    | 1/2  | 0.0   | 0.0   | 1.0       | 1.0              |
| O    | 1/4  | 1/12  | 0.0   | 1.0       | 1.0              |
| O    | 3/4  | 1/12  | 0.0   | 1.0       | 1.0              |
| O    | 0.0  | 1/6   | 0.0   | 1.0       | 1.0              |
| O    | 1/2  | 1/6   | 0.0   | 1.0       | 1.0              |
| O    | 1/4  | 1/4   | 0.0   | 1.0       | 1.0              |
| O    | 3/4  | 1/4   | 0.0   | 1.0       | 1.0              |
| O    | 0.0  | 1/3   | 0.0   | 1.0       | 1.0              |
| O    | 1/2  | 1/3   | 0.0   | 1.0       | 1.0              |
| O    | 1/4  | 5/12  | 0.0   | 1.0       | 1.0              |
| O    | 3/4  | 5/12  | 0.0   | 1.0       | 1.0              |
| O    | 0.0  | 1/2   | 0.0   | 1.0       | 1.0              |
| O    | 1/2  | 1/2   | 0.0   | 1.0       | 1.0              |
| O    | 1/4  | 7/12  | 0.0   | 1.0       | 1.0              |
| O    | 3/4  | 7/12  | 0.0   | 1.0       | 1.0              |
| O    | 0.0  | 2/3   | 0.0   | 1.0       | 1.0              |
| O    | 1/2  | 2/3   | 0.0   | 1.0       | 1.0              |
| O    | 1/4  | 3/4   | 0.0   | 1.0       | 1.0              |
| O    | 3/4  | 3/4   | 0.0   | 1.0       | 1.0              |
| O    | 0.0  | 5/6   | 0.0   | 1.0       | 1.0              |
| O    | 1/2  | 5/6   | 0.0   | 1.0       | 1.0              |
| O    | 1/4  | 11/12 | 0.0   | 1.0       | 1.0              |
| O    | 3/4  | 11/12 | 0.0   | 1.0       | 1.0              |
| Mn   | 1/3  | 1/6   | 0.225 | 1.0       | 1.0              |
| Mn   | 5/6  | 1/6   | 0.225 | 1.0       | 1.0              |
| Mn   | 1/12 | 1/4   | 0.225 | 1.0       | 1.0              |
| Mn   | 7/12 | 1/4   | 0.225 | 1.0       | 1.0              |
| Mn   | 1/12 | 5/12  | 0.225 | 1.0       | 1.0              |
| Mn   | 7/12 | 5/12  | 0.225 | 1.0       | 1.0              |
| Mn   | 1/3  | 1/2   | 0.225 | 1.0       | 1.0              |
| Mn   | 5/6  | 1/2   | 0.225 | 1.0       | 1.0              |
| Mn   | 1/3  | 2/3   | 0.225 | 1.0       | 1.0              |
| Mn   | 5/6  | 2/3   | 0.225 | 1.0       | 1.0              |
| Mn   | 1/12 | 3/4   | 0.225 | 1.0       | 1.0              |
| Mn   | 7/12 | 3/4   | 0.225 | 1.0       | 1.0              |
| Mn   | 1/12 | 11/12 | 0.225 | 1.0       | 1.0              |
| Mn   | 7/12 | 11/12 | 0.225 | 1.0       | 1.0              |
| Mn   | 1/3  | 1.0   | 0.225 | 1.0       | 1.0              |

|    |       |       |       |     |     |
|----|-------|-------|-------|-----|-----|
| Mn | 5/6   | 1.0   | 0.225 | 1.0 | 1.0 |
| Li | 1/12  | 1/12  | 0.225 | 1.0 | 1.0 |
| Li | 7/12  | 1/12  | 0.225 | 1.0 | 1.0 |
| Li | 1/3   | 1/3   | 0.225 | 1.0 | 1.0 |
| Li | 5/6   | 1/3   | 0.225 | 1.0 | 1.0 |
| Li | 1/12  | 7/12  | 0.225 | 1.0 | 1.0 |
| Li | 7/12  | 7/12  | 0.225 | 1.0 | 1.0 |
| Li | 1/3   | 5/6   | 0.225 | 1.0 | 1.0 |
| Li | 5/6   | 5/6   | 0.225 | 1.0 | 1.0 |
| O  | 1/6   | 0.0   | 0.45  | 1.0 | 1.0 |
| O  | 2/3   | 0.0   | 0.45  | 1.0 | 1.0 |
| O  | 5/12  | 1/12  | 0.45  | 1.0 | 1.0 |
| O  | 11/12 | 1/12  | 0.45  | 1.0 | 1.0 |
| O  | 1/6   | 1/6   | 0.45  | 1.0 | 1.0 |
| O  | 2/3   | 1/6   | 0.45  | 1.0 | 1.0 |
| O  | 5/12  | 1/4   | 0.45  | 1.0 | 1.0 |
| O  | 11/12 | 1/4   | 0.45  | 1.0 | 1.0 |
| O  | 1/6   | 1/3   | 0.45  | 1.0 | 1.0 |
| O  | 2/3   | 1/3   | 0.45  | 1.0 | 1.0 |
| O  | 5/12  | 5/12  | 0.45  | 1.0 | 1.0 |
| O  | 11/12 | 5/12  | 0.45  | 1.0 | 1.0 |
| O  | 1/6   | 1/2   | 0.45  | 1.0 | 1.0 |
| O  | 2/3   | 1/2   | 0.45  | 1.0 | 1.0 |
| O  | 5/12  | 7/12  | 0.45  | 1.0 | 1.0 |
| O  | 11/12 | 7/12  | 0.45  | 1.0 | 1.0 |
| O  | 1/6   | 2/3   | 0.45  | 1.0 | 1.0 |
| O  | 2/3   | 2/3   | 0.45  | 1.0 | 1.0 |
| O  | 5/12  | 3/4   | 0.45  | 1.0 | 1.0 |
| O  | 11/12 | 3/4   | 0.45  | 1.0 | 1.0 |
| O  | 1/6   | 5/6   | 0.45  | 1.0 | 1.0 |
| O  | 2/3   | 5/6   | 0.45  | 1.0 | 1.0 |
| O  | 5/12  | 11/12 | 0.45  | 1.0 | 1.0 |
| O  | 11/12 | 11/12 | 0.45  | 1.0 | 1.0 |
| Li | 1/2   | 1/6   | 0.777 | 1.0 | 1.0 |
| Li | 1.0   | 1/6   | 0.777 | 1.0 | 1.0 |
| Li | 1/4   | 1/4   | 0.777 | 1.0 | 1.0 |
| Li | 3/4   | 1/4   | 0.777 | 1.0 | 1.0 |
| Li | 1/4   | 5/12  | 0.777 | 1.0 | 1.0 |
| Li | 3/4   | 5/12  | 0.777 | 1.0 | 1.0 |
| Li | 1/2   | 1/2   | 0.777 | 1.0 | 1.0 |
| Li | 1.0   | 1/2   | 0.777 | 1.0 | 1.0 |
| Li | 1/2   | 2/3   | 0.777 | 1.0 | 1.0 |
| Li | 1.0   | 2/3   | 0.777 | 1.0 | 1.0 |
| Li | 1/4   | 3/4   | 0.777 | 1.0 | 1.0 |
| Li | 3/4   | 3/4   | 0.777 | 1.0 | 1.0 |
| Li | 1/4   | 11/12 | 0.777 | 1.0 | 1.0 |
| Li | 3/4   | 11/12 | 0.777 | 1.0 | 1.0 |
| Li | 1/2   | 1.0   | 0.777 | 1.0 | 1.0 |
| Li | 1.0   | 1.0   | 0.777 | 1.0 | 1.0 |
| Li | 1/4   | 1/12  | 0.777 | 1.0 | 1.0 |
| Li | 3/4   | 1/12  | 0.777 | 1.0 | 1.0 |
| Li | 1/2   | 1/3   | 0.777 | 1.0 | 1.0 |
| Li | 1.0   | 1/3   | 0.777 | 1.0 | 1.0 |
| Li | 1/4   | 7/12  | 0.777 | 1.0 | 1.0 |
| Li | 3/4   | 7/12  | 0.777 | 1.0 | 1.0 |
| Li | 1/2   | 5/6   | 0.777 | 1.0 | 1.0 |
| Li | 1.0   | 5/6   | 0.777 | 1.0 | 1.0 |

*Description the  $\text{LiMn}_2\text{O}_4$  cell*

| Atom | x     | y     | z     | Occ. fact | B <sub>iso</sub> |
|------|-------|-------|-------|-----------|------------------|
| O    | 0.0   | 0.0   | 0.0   | 1.0       | 1.0              |
| O    | 1/2   | 0.0   | 0.0   | 1.0       | 1.0              |
| O    | 1/4   | 1/12  | 0.0   | 1.0       | 1.0              |
| O    | 3/4   | 1/12  | 0.0   | 1.0       | 1.0              |
| O    | 0.0   | 1/6   | 0.0   | 1.0       | 1.0              |
| O    | 1/2   | 1/6   | 0.0   | 1.0       | 1.0              |
| O    | 1/4   | 1/4   | 0.0   | 1.0       | 1.0              |
| O    | 3/4   | 1/4   | 0.0   | 1.0       | 1.0              |
| O    | 0.0   | 1/3   | 0.0   | 1.0       | 1.0              |
| O    | 1/2   | 1/3   | 0.0   | 1.0       | 1.0              |
| O    | 1/4   | 5/12  | 0.0   | 1.0       | 1.0              |
| O    | 3/4   | 5/12  | 0.0   | 1.0       | 1.0              |
| O    | 0.0   | 1/2   | 0.0   | 1.0       | 1.0              |
| O    | 1/2   | 1/2   | 0.0   | 1.0       | 1.0              |
| O    | 1/4   | 7/12  | 0.0   | 1.0       | 1.0              |
| O    | 3/4   | 7/12  | 0.0   | 1.0       | 1.0              |
| O    | 0.0   | 2/3   | 0.0   | 1.0       | 1.0              |
| O    | 1/2   | 2/3   | 0.0   | 1.0       | 1.0              |
| O    | 1/4   | 3/4   | 0.0   | 1.0       | 1.0              |
| O    | 3/4   | 3/4   | 0.0   | 1.0       | 1.0              |
| O    | 0.0   | 5/6   | 0.0   | 1.0       | 1.0              |
| O    | 1/2   | 5/6   | 0.0   | 1.0       | 1.0              |
| O    | 1/4   | 11/12 | 0.0   | 1.0       | 1.0              |
| O    | 3/4   | 11/12 | 0.0   | 1.0       | 1.0              |
| Mn   | 1/12  | 1/12  | 0.231 | 1.0       | 1.0              |
| Mn   | 7/12  | 1/12  | 0.231 | 1.0       | 1.0              |
| Mn   | 1/3   | 1/6   | 0.231 | 1.0       | 1.0              |
| Mn   | 1/12  | 1/4   | 0.231 | 1.0       | 1.0              |
| Mn   | 7/12  | 1/4   | 0.231 | 1.0       | 1.0              |
| Mn   | 5/6   | 1/3   | 0.231 | 1.0       | 1.0              |
| Mn   | 1/12  | 5/12  | 0.231 | 1.0       | 1.0              |
| Mn   | 7/12  | 5/12  | 0.231 | 1.0       | 1.0              |
| Mn   | 1/3   | 1/2   | 0.231 | 1.0       | 1.0              |
| Mn   | 1/12  | 7/12  | 0.231 | 1.0       | 1.0              |
| Mn   | 7/12  | 7/12  | 0.231 | 1.0       | 1.0              |
| Mn   | 5/6   | 2/3   | 0.231 | 1.0       | 1.0              |
| Mn   | 1/12  | 3/4   | 0.231 | 1.0       | 1.0              |
| Mn   | 7/12  | 3/4   | 0.231 | 1.0       | 1.0              |
| Mn   | 1/3   | 5/6   | 0.231 | 1.0       | 1.0              |
| Mn   | 1/12  | 11/12 | 0.231 | 1.0       | 1.0              |
| Mn   | 7/12  | 11/12 | 0.231 | 1.0       | 1.0              |
| Mn   | 5/6   | 1     | 0.231 | 1.0       | 1.0              |
| O    | 1/6   | 0     | 0.462 | 1.0       | 1.0              |
| O    | 2/3   | 0     | 0.462 | 1.0       | 1.0              |
| O    | 5/12  | 1/12  | 0.462 | 1.0       | 1.0              |
| O    | 11/12 | 1/12  | 0.462 | 1.0       | 1.0              |
| O    | 1/6   | 1/6   | 0.462 | 1.0       | 1.0              |
| O    | 2/3   | 1/6   | 0.462 | 1.0       | 1.0              |
| O    | 5/12  | 1/4   | 0.462 | 1.0       | 1.0              |
| O    | 11/12 | 1/4   | 0.462 | 1.0       | 1.0              |
| O    | 1/6   | 1/3   | 0.462 | 1.0       | 1.0              |
| O    | 2/3   | 1/3   | 0.462 | 1.0       | 1.0              |
| O    | 5/12  | 5/12  | 0.462 | 1.0       | 1.0              |
| O    | 11/12 | 5/12  | 0.462 | 1.0       | 1.0              |
| O    | 1/6   | 1/2   | 0.462 | 1.0       | 1.0              |
| O    | 2/3   | 1/2   | 0.462 | 1.0       | 1.0              |
| O    | 5/12  | 7/12  | 0.462 | 1.0       | 1.0              |
| O    | 11/12 | 7/12  | 0.462 | 1.0       | 1.0              |
| O    | 1/6   | 2/3   | 0.462 | 1.0       | 1.0              |
| O    | 2/3   | 2/3   | 0.462 | 1.0       | 1.0              |

|    |       |       |       |     |     |
|----|-------|-------|-------|-----|-----|
| O  | 5/12  | 3/4   | 0.462 | 1.0 | 1.0 |
| O  | 11/12 | 3/4   | 0.462 | 1.0 | 1.0 |
| O  | 1/6   | 5/6   | 0.462 | 1.0 | 1.0 |
| O  | 2/3   | 5/6   | 0.462 | 1.0 | 1.0 |
| O  | 5/12  | 11/12 | 0.462 | 1.0 | 1.0 |
| O  | 11/12 | 11/12 | 0.462 | 1.0 | 1.0 |
| Li | 2/3   | 0.0   | 0.866 | 1.0 | 1.0 |
| Li | 1/6   | 1/6   | 0.866 | 1.0 | 1.0 |
| Li | 2/3   | 1/3   | 0.866 | 1.0 | 1.0 |
| Li | 1/6   | 1/2   | 0.866 | 1.0 | 1.0 |
| Li | 2/3   | 2/3   | 0.866 | 1.0 | 1.0 |
| Li | 1/6   | 5/6   | 0.866 | 1.0 | 1.0 |
| Li | 1/3   | 0.0   | 0.597 | 1.0 | 1.0 |
| Li | 5/6   | 1/6   | 0.597 | 1.0 | 1.0 |
| Li | 1/3   | 1/3   | 0.597 | 1.0 | 1.0 |
| Li | 5/6   | 1/2   | 0.597 | 1.0 | 1.0 |
| Li | 1/3   | 2/3   | 0.597 | 1.0 | 1.0 |
| Li | 5/6   | 5/6   | 0.597 | 1.0 | 1.0 |
| Mn | 0.0   | 0.0   | 0.731 | 1.0 | 1.0 |
| Mn | 1/2   | 1/6   | 0.731 | 1.0 | 1.0 |
| Mn | 0.0   | 1/3   | 0.731 | 1.0 | 1.0 |
| Mn | 1/2   | 1/2   | 0.731 | 1.0 | 1.0 |
| Mn | 0.0   | 2/3   | 0.731 | 1.0 | 1.0 |
| Mn | 1/2   | 5/6   | 0.731 | 1.0 | 1.0 |

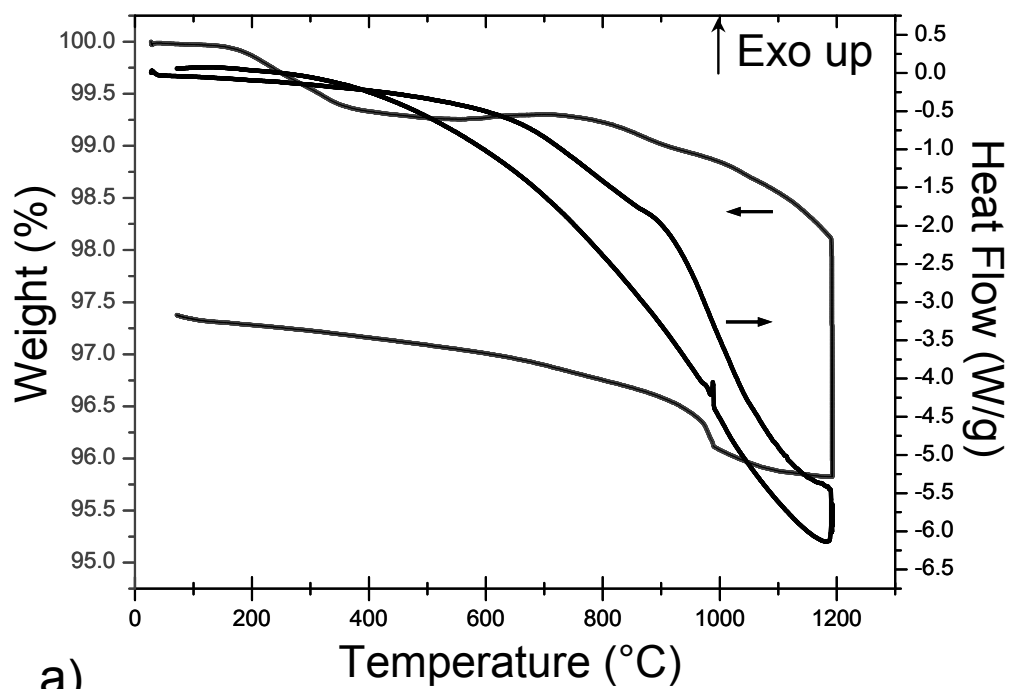

a)

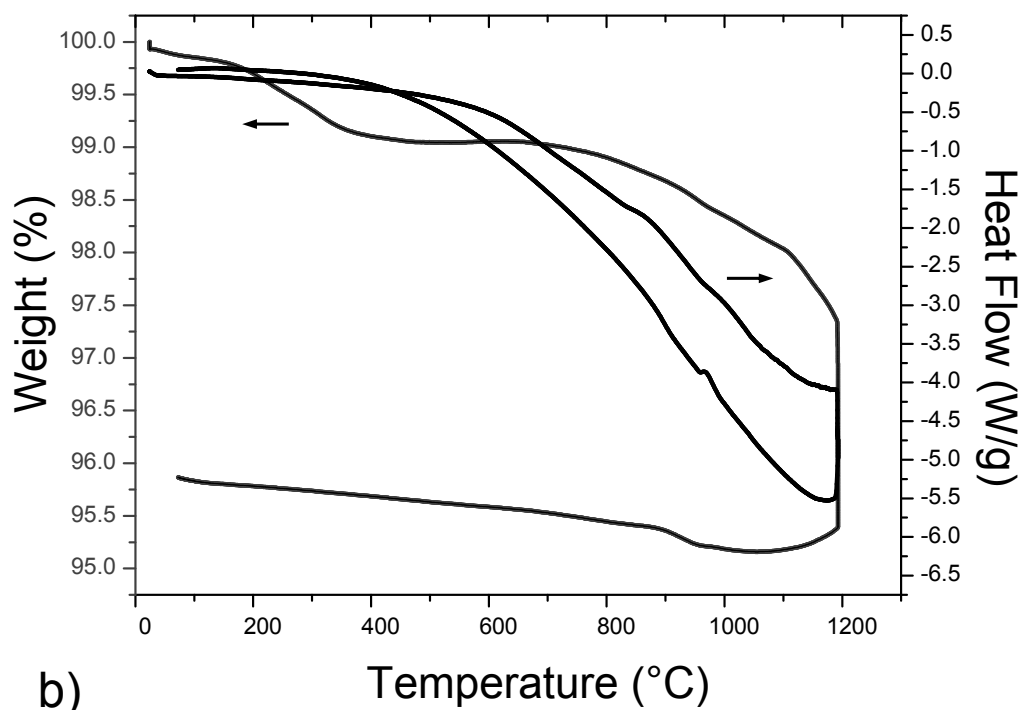

b)

**Fig. S2.** TGA and DTA curves obtained with the materials recovered after heating the 650°C synthesized powder sample until a) 1200°C in oxygen for 4h and b) 1200°C in argon atmosphere for 1h.
